# Supplementary material for: “Dry ionic liquid” as a newcomer to “dry matter”
Source: Royal Society of Chemistry journal article supplement (doi:10.1039/c1sm05999h), 2011-01-01
Supplement: c1sm05999h.pdf [file c1sm05999h.pdf]

## Electronic Supplementary Information

“Dry Ionic Liquid” as a newcomer to “Dry Matter”

Mitsuru Satoh\* and Kazushi Shirato

Department of Chemistry and Materials Science, Tokyo Institute of Technology,  
Ookayama, Meguro-ku, Tokyo 152-8550, JAPAN

### METHODS

Hydrophobic fumed silica particle (HDK-H18, primary particle size:5-30 nm), the surface OH groups of which are modified with poly(dimethyl siloxane) by 75 %, was purchased from Wacker Asahikasei Silicone and used as received. Poly(tetrafluoro ethylene) (PTFE) powder (KTL-500F,  $\phi$ :0.5  $\mu$  m) was kindly supplied by Kitamura Ltd and used as received. ILs ([emim][Tf<sub>2</sub>N] (99%), [emim][TfO](99%), [bmim][I](>98%) and [ch][dhp]) were purchased from IoLi Tec GmbH and used as received. Their structures are given in Fig.S1. D-ILs were prepared by mixing ca. 7 g of an IL with different amounts of the hydrophobic particles in a blender (WARING J-SPEC Blender 7011 BUJ with a MC1 container (50 mL)) at 22500 rpm for 90s with two intervals of 10 s each to prevent the sample from overheat. DW was prepared by mixing HDK-H18 and deionized water in a blender (Vitamix Vita-prep3 with a 0.9L container) at a speed of 24000 rpm for 90s with two intervals of 10 s each. The feed ratio of the silica powder was varied from 1.0 to 20.0 wt% with the total amount kept constant (ca. 50 g). Among of the compositions tested, only one with 1.0 wt% silica failed to take in all the feed water as component of DW. Each sample was stored in a screw-capped polypropylene bottle. Morphology of D-ILs was observed with an optical microscope (Keyence, VHX-1000).

|                           |                                                                                      |
|---------------------------|--------------------------------------------------------------------------------------|
| [emim][Tf <sub>2</sub> N] | 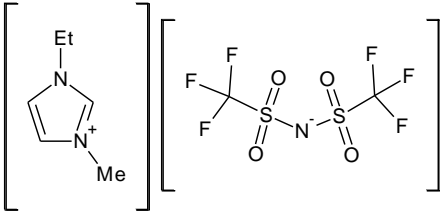   |
| [emim][TfO]               |    |
| [bmim]I                   |     |
| [ch][dhp]                 |  |

Figure S1. Structure of ILs.
